# Supplementary material for: Development of an unmodified screen-printed graphene electrode for nonenzymatic histamine detection
Source: Royal Society of Chemistry journal article supplement (doi:10.1039/d0ay01443e), 2020-01-01
Supplement: d0ay01443e1.pdf [file d0ay01443e1.pdf]

## Supplementary information

### Development of an Unmodified Screen-Printed Graphene Electrode for Nonenzymatic Histamine Detection

Prangthip Nakthong <sup>a</sup>, Takeshi Kondo <sup>b</sup>, Orawon Chailapakula <sup>c</sup>, and Weena Siangproh <sup>a\*</sup>

<sup>a</sup> *Electroanalytical and Imaging Sensor Research Group (EISRG), Department of Chemistry, Faculty of Science, Srinakharinwirot University, Sukhumvit 23, Wattana, Bangkok 10110, Thailand*

<sup>b</sup> *Department of Pure and Applied Chemistry, Faculty of Science and Technology, Tokyo University of Science, 2641 Yamazaki, Noda, Chiba, 278-8510, Japan*

<sup>c</sup> *Electrochemistry and Optical Spectroscopy Research Unit (EOSRU), Department of Chemistry, Faculty of Science, Chulalongkorn University, 254 Phayathai Road, Patumwan, Bangkok 10330, Thailand*

\*Corresponding author: Tel: +662 640 5000 ext.18208; Fax: +662 259 2097

E-mail address: [weena@g.swu.ac.th](mailto:weena@g.swu.ac.th), [weenasi@hotmail.com](mailto:weenasi@hotmail.com)

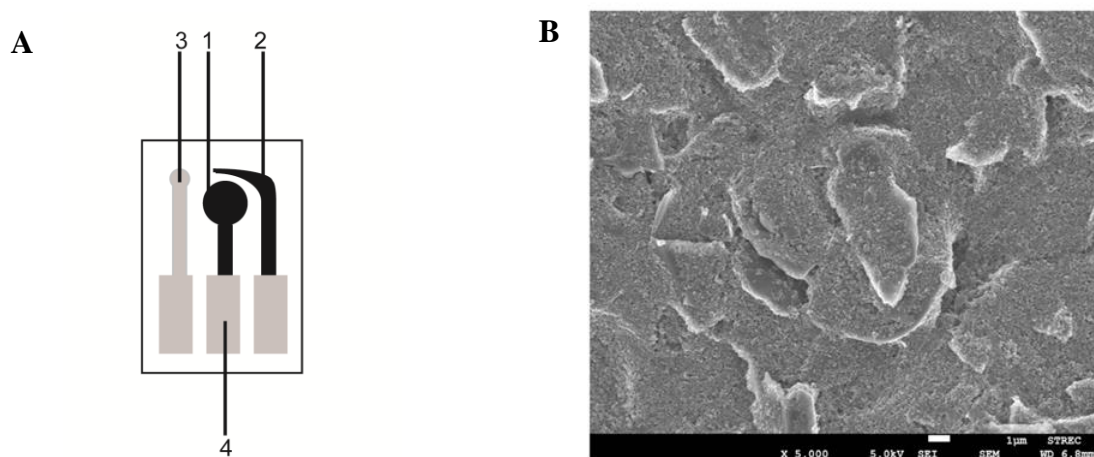

**Fig. S1.** (A) Screen-printed graphene electrode (SPGE). Graphene ink was printed to obtain the working electrode (1) and auxiliary (2), respectively. Ag/AgCl ink was printed to obtain the reference electrode (3) and conducting pads or electric contacts (4). (B) SEM images of surface morphology of graphene screen-printed electrodes.

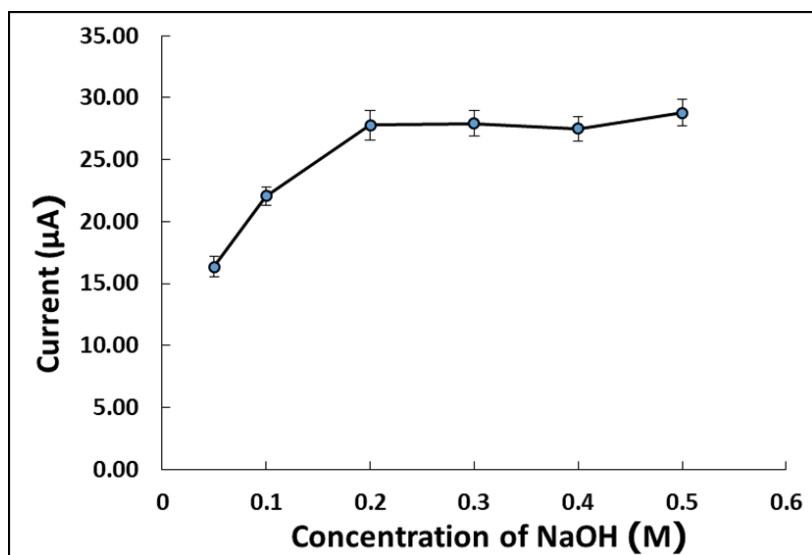

**Fig. S2.** The effect of NaOH concentration

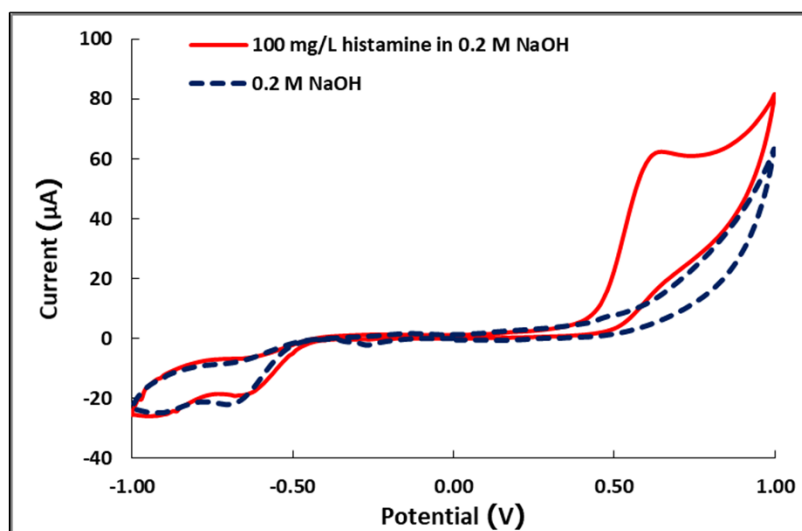

**Fig. S3.** Cyclic voltammograms obtained from unmodified SPGE in 0.2 M NaOH (blue line) and 100 mg/L histamine in 0.2 M NaOH (red line), respectively.

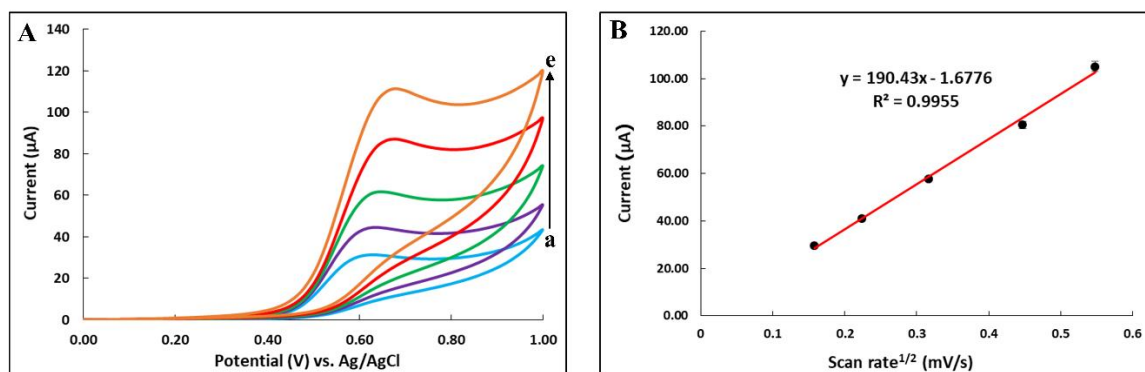

**Fig. S4.** (A) Cyclic voltammograms of histamine at unmodified SPGE in 0.2 M NaOH using different scan rates (a-e: 25, 50, 100, 200, and 300 mV/s, respectively), (B) Plot of the anodic peak currents *versus* the square root of the scan rate.

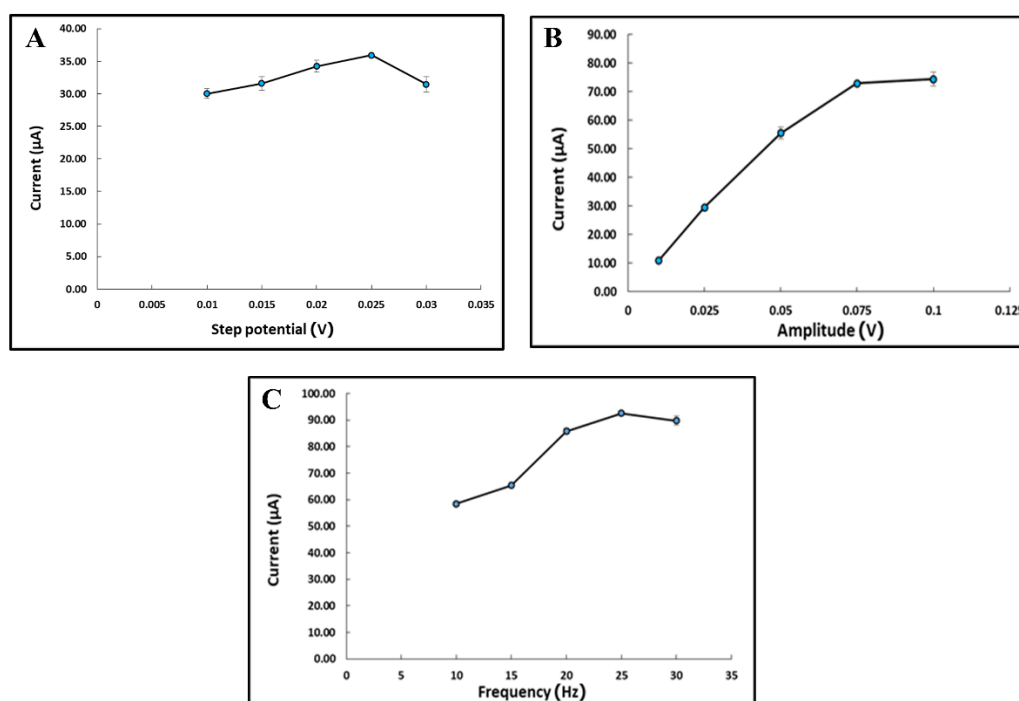

**Fig. S5.** Optimization of square wave voltammetric parameters for histamine detection using unmodified SPGE: (A) step potential, (B) amplitude, and (C) frequency
